# Supplementary material for: TRP channels and monoterpenes: Past and current leads on analgesic properties
Source: Front Mol Neurosci. 2022 Jul 29;15:945450. doi: 10.3389/fnmol.2022.945450 (PMC9373873; doi:10.3389/fnmol.2022.945450)
Supplement: Supplementary file 1 [file Table_1.XLSX]

## Sheet: Feuille 1
Dataset 1: List of plants containing isomenthol (ISOMTL), isomenthone (ISOMTN), menthol (MTL), pulegone (PUL), piperitone (PIP), menthone (MTN), neoisomenthol (NEOISOMTL), neomenthol (NMTL).
Family	Genera	Species	Corrected species	Molecule
Apiaceae	Diplotaenia	Diplotaenia cachrydifolia	Diplotaenia cachrydifolia Boiss.	PUL
Araliaceae	Panax	Panax quinquefolius	Panax quinquefolius L.	PUL
Asteraceae	Achillea	Achillea cuneatiloba	Achillea cuneatiloba Boiss. & Buhse	PUL
Asteraceae	Artemisia	Artemisia judaica	Artemisia judaica L.	PUL
Asteraceae	Bellis	Bellis perennis	Bellis perennis L.	PUL
Asteraceae	Centaurea	Centaurea sessilis	Centaurea oltensis Sosn.	PUL
Asteraceae	Rhanterium	Rhanterium epapposum	Rhanterium epapposum Oliv.	PUL
Basellaceae	Basella	Basella alba	Basella alba L.	PUL
Canellaceae	Canella	Canella winterana	Canella winterana (L.) Gaertn.	PUL
Cannabaceae	Cannabis	Cannabis sativa	Cannabis sativa L.	PUL
Chloranthaceae	Hedyosmum	Hedyosmum mexicanum	Hedyosmum mexicanum C.Cordem.	PUL
Cistaceae	Fumana	Fumana thymifolia	Fumana thymifolia (L.) Webb	PUL
Ephedraceae	Ephedra	Ephedra sinica	Ephedra sinica Stapf	PUL
Ericaceae	Vaccinium	Vaccinium ashei	Vaccinium corymbosum L.	PUL
Ericaceae	Vaccinium	Vaccinium virgatum	Vaccinium pallidum Aiton	PUL
Gentianaceae	Swertia	Swertia japonica	Swertia japonica (Schult.) Makino	PUL
Grossulariaceae	RIbes	Ribes nigrum	Ribes nigrum L.	PUL
Lamiaceae	Agastache	Agastache pallidiflora	Agastache pallidiflora (A.Heller) Rydb.	PUL
Lamiaceae	Agastache	Agastache formosana	Agastache rugosa (Fisch. & C.A.Mey.) Kuntze	PUL
Lamiaceae	Agastache	Agastache urticifolia	Agastache urticifolia (Benth.) Kuntze	PUL
Lamiaceae	Betonica	Betonica macrantha	Betonica macrantha K.Koch	PUL
Lamiaceae	Cantinoa	Hyptis spicigera	Cantinoa americana (Aubl.) Harley & J.F.B.Pastore	PUL
Lamiaceae	Clinopodium	Micromeria thymifolia	Clinopodium album (Waldst. & Kit.) Bräuchler & Govaerts	PUL
Lamiaceae	Clinopodium	Clinopodium arkansanum	Clinopodium arkansanum (Nutt.) House	PUL
Lamiaceae	Clinopodium	Clinopodium glabrum	Clinopodium arkansanum (Nutt.) House	PUL
Lamiaceae	Clinopodium	Calamintha incana	Clinopodium brevifolium (Wahlenb.) Bräuchler & Hjertson	PUL
Lamiaceae	Clinopodium	Clinopodium brownei	Clinopodium brownei (Sw.) Kuntze	PUL
Lamiaceae	Clinopodium	Clinopodium capitellatum	Clinopodium capitellatum (Benth.)	PUL
Lamiaceae	Clinopodium	Clinopodium carolinianum	Clinopodium carolinianum Mill.	PUL
Lamiaceae	Clinopodium	Clinopodium congestum	Clinopodium congestum (Boiss. & Hausskn.) Kuntze	PUL
Lamiaceae	Clinopodium	Micromeria congesta	Clinopodium congestum (Boiss. & Hausskn.) Kuntze	PUL
Lamiaceae	Clinopodium	Micromeria dalmatica	Clinopodium dalmaticum (Benth.)	PUL
Lamiaceae	Clinopodium	Clinopodium gilliesii	Clinopodium gilliesii (Benth.) Kuntze	PUL
Lamiaceae	Clinopodium	Satureja parvifolia	Clinopodium gilliesii (Benth.) Kuntze	PUL
Lamiaceae	Clinopodium	Satureja glabella	Clinopodium glabellum (Michx.)	PUL
Lamiaceae	Clinopodium	Clinopodium grandiflorum	Clinopodium grandiflorum (L.) Kuntze	PUL
Lamiaceae	Clinopodium	Satureja grandiflora	Clinopodium grandiflorum (L.) Kuntze	PUL
Lamiaceae	Clinopodium	Clinopodium menthifolium	Clinopodium menthifolium (Host) Merino	PUL
Lamiaceae	Clinopodium	Clinopodium menthifolium	Clinopodium menthifolium (Host) Merino	PUL
Lamiaceae	Clinopodium	Calamintha nepeta	Clinopodium nepeta (L.) Kuntze	PUL
Lamiaceae	Clinopodium	Clinopodium nepeta	Clinopodium nepeta (L.) Kuntze	PUL
Lamiaceae	Clinopodium	Clinopodium odorum	Clinopodium odorum (Griseb.) Harley	PUL
Lamiaceae	Clinopodium	Satureja odora	Clinopodium odorum (Griseb.) Harley	PUL
Lamiaceae	Clinopodium	Clinopodium pamphylicum	Clinopodium pamphylicum (Boiss. & Heldr.) Govaerts	PUL
Lamiaceae	Clinopodium	Clinopodium serpyllifolium	Clinopodium serpyllifolium (M.Bieb.) Kuntze	PUL
Lamiaceae	Clinopodium	Micromeria fruticosa	Clinopodium serpyllifolium subsp. fruticosum (L.) Bräuchler	PUL
Lamiaceae	Clinopodium	Acinos suaveolens	Clinopodium suaveolens (Sm.) Kuntze	PUL
Lamiaceae	Clinopodium	Clinopodium suaveolens	Clinopodium suaveolens (Sm.) Kuntze	PUL
Lamiaceae	Clinopodium	Clinopodium vimineum	Clinopodium vimineum (L.) Kuntze	PUL
Lamiaceae	Cunila	Cunila fasciculata	Cunila fasciculata Benth.	PUL
Lamiaceae	Cunila	Cunila microcephala	Cunila microcephala Benth.	PUL
Lamiaceae	Cyclotrichium	Cyclotrichium niveum	Cyclotrichium niveum (Boiss.) Manden. & Scheng.	PUL
Lamiaceae	Dracocephalum	Dracocephalum thymiflora	Dracocephalum thymiflorum L.	PUL
Lamiaceae	Dracocephalum	Moldavica thymiflora	Dracocephalum thymiflorum L.	PUL
Lamiaceae	Glechoma	Glechoma hederacea	Glechoma hederacea L.	PUL
Lamiaceae	Hedeoma	Hedeoma drummondii	Hedeoma drummondii Benth.	PUL
Lamiaceae	Hedeoma	Hedeoma mandoniana	Hedeoma mandoniana Wedd.	PUL
Lamiaceae	Hedeoma	Hedeoma multiflora	Hedeoma multiflora Benth.	PUL
Lamiaceae	Hedeoma	Hedeoma pulegioides	Hedeoma pulegioides (L.) Pers.	PUL
Lamiaceae	Hesperozygis	Hesperozygis rhododon	Hesperozygis rhododon Epling	PUL
Lamiaceae	Hesperozygis	Hesperozygis ringens	Hesperozygis ringens (Benth.) Epling	PUL
Lamiaceae	Lavandula	Lavandula stoechas	Lavandula stoechas L.	PUL
Lamiaceae	Lepechinia	Lepechinia chamaedryoides	Lepechinia chilensis (Molina) R.Morales	PUL
Lamiaceae	Lycopus	Lycopus virginicus	Lycopus virginicus L.	PUL
Lamiaceae	Mentha	Mentha piperita	Mentha × piperita L.	PUL
Lamiaceae	Mentha	Mentha x piperita	Mentha × piperita L.	PUL
Lamiaceae	Mentha	Mentha rotundifolia	Mentha × rotundifolia (L.) Huds.	PUL
Lamiaceae	Mentha	Mentha x rotundifolia	Mentha × rotundifolia (L.) Huds.	PUL
Lamiaceae	Mentha	Mentha verticillata	Mentha × verticillata L.	PUL
Lamiaceae	Mentha	Mentha aquatica	Mentha aquatica L.	PUL
Lamiaceae	Mentha	Mentha arvensis	Mentha arvensis L.	PUL
Lamiaceae	Mentha	Mentha arvensis var. piperascens	Mentha canadensis L.	PUL
Lamiaceae	Mentha	Mentha canadensis	Mentha canadensis L.	PUL
Lamiaceae	Mentha	Mentha cervina	Mentha cervina L.	PUL
Lamiaceae	Mentha	Mentha gattefossei	Mentha gattefossei Maire	PUL
Lamiaceae	Mentha	Mentha grandiflora	Mentha grandiflora Benth.	PUL
Lamiaceae	Mentha	Mentha japonica	Mentha japonica (Miq.) Makino	PUL
Lamiaceae	Mentha	Mentha longifolia	Mentha longifolia (L.) L.	PUL
Lamiaceae	Mentha	Mentha pulegium	Mentha pulegium L.	PUL
Lamiaceae	Mentha	Mentha requienii	Mentha requienii Benth.	PUL
Lamiaceae	Mentha	Mentha spicata	Mentha spicata L.	PUL
Lamiaceae	Mentha	Mentha suaveolens	Mentha suaveolens Ehrh.	PUL
Lamiaceae	Mentha	Mentha timija	Mentha suaveolens subsp. timija (Coss. ex Briq.) Harley	PUL
Lamiaceae	Micromeria	Micromeria croatica	Micromeria croatica (Pers.) Schott	PUL
Lamiaceae	Micromeria	Clinopodium douglasii	Micromeria douglasii Benth.	PUL
Lamiaceae	Micromeria	Satureja douglasii	Micromeria douglasii Benth.	PUL
Lamiaceae	Micromeria	Micromeria juliana	Micromeria juliana (L.) Benth. ex Rchb.	PUL
Lamiaceae	Micromeria	Micromeria myrtifolia	Micromeria myrtifolia Boiss. & Hohen.	PUL
Lamiaceae	Minthostachys	Minthostachys andina	Minthostachys andina (Britton ex Rusby) Epling	PUL
Lamiaceae	Minthostachys	Minthostachys glabrescens	Minthostachys glabrescens (Benth.) Epling	PUL
Lamiaceae	Minthostachys	Bystropogon mollis	Minthostachys mollis (Benth.) Griseb.	PUL
Lamiaceae	Minthostachys	Minthostachys mollis	Minthostachys mollis (Benth.) Griseb.	PUL
Lamiaceae	Minthostachys	Minthostachys verticillata	Minthostachys verticillata (Griseb.) Epling	PUL
Lamiaceae	Monarda	Monarda clinopodia	Monarda clinopodia L.	PUL
Lamiaceae	Monarda	Monarda didyma	Monarda didyma L.	PUL
Lamiaceae	Monarda	Monarda fistulosa	Monarda fistulosa L.	PUL
Lamiaceae	Monarda	Monarda punctata	Monarda punctata L.	PUL
Lamiaceae	Monarda	Monarda russeliana	Monarda russeliana Nutt. ex Sims	PUL
Lamiaceae	Nepeta	Nepeta cataria	Nepeta cataria L.	PUL
Lamiaceae	Nepeta	Schizonepeta multifida	Nepeta multifida L.	PUL
Lamiaceae	Nepeta	Nepeta racemosa	Nepeta racemosa Lam.	PUL
Lamiaceae	Origanum	Origanum adanense	Origanum × adanense Baser & H.Duman	PUL
Lamiaceae	Origanum	Origanum laevigatum	Origanum laevigatum Boiss.	PUL
Lamiaceae	Perilla	Perilla frutescens	Perilla frutescens (L.) Britton	PUL
Lamiaceae	Poliomintha	Poliomintha incana	Poliomintha incana (Torr.) A.Gray	PUL
Lamiaceae	Pycnanthemum	Pycnanthemum albescens	Pycnanthemum albescens Torr. & A.Gray	PUL
Lamiaceae	Pycnanthemum	Pycnanthemum beadlei	Pycnanthemum beadlei (Small) Fernald	PUL
Lamiaceae	Pycnanthemum	Pycnanthemum californicum	Pycnanthemum californicum Torr. ex Durand	PUL
Lamiaceae	Pycnanthemum	Pycnanthemum clinopodioides	Pycnanthemum clinopodioides Torr. & A.Gray	PUL
Lamiaceae	Pycnanthemum	Pycnanthemum floridanum	Pycnanthemum floridanum E.Grant & Epling	PUL
Lamiaceae	Pycnanthemum	Pycnanthemum incanum	Pycnanthemum incanum (L.) Michx.	PUL
Lamiaceae	Pycnanthemum	Pycnanthemum loomisii	Pycnanthemum loomisii Nutt.	PUL
Lamiaceae	Pycnanthemum	Pycnanthemum montanum	Pycnanthemum montanum Michx.	PUL
Lamiaceae	Pycnanthemum	Pycnanthemum muticum	Pycnanthemum muticum (Michx.) Pers.	PUL
Lamiaceae	Pycnanthemum	Pycnanthemum pycnanthemoides	Pycnanthemum pycnanthemoides (Leavenw.) Fernald	PUL
Lamiaceae	Pycnanthemum	Pycnanthemum setosum	Pycnanthemum setosum Nutt.	PUL
Lamiaceae	Pycnanthemum	Pycnanthemum tenuifolium	Pycnanthemum tenuifolium Schrad.	PUL
Lamiaceae	Pycnanthemum	Pycnanthemum torreyi	Pycnanthemum torreyi Benth.	PUL
Lamiaceae	Pycnanthemum	Pycnanthemum verticillatum	Pycnanthemum verticillatum (Michx.) Pers.	PUL
Lamiaceae	Pycnanthemum	Pycnanthemum pilosum	Pycnanthemum verticillatum var. pilosum	PUL
Lamiaceae	Pycnanthemum	Pycnanthemum virginianum	Pycnanthemum virginianum (L.) T.Durand & B.D.Jacks. ex B.L.Rob. & Fernald	PUL
Lamiaceae	Salvia	Salvia rosmarinus	Salvia rosmarinus Spenn.	PUL
Lamiaceae	Satureja	Satureja cilicica	Satureja cilicica P.H.Davis	PUL
Lamiaceae	Satureja	Satureja hortensis	Satureja hortensis	PUL
Lamiaceae	Sideritis	Sideritis tragoriganum	Sideritis tragoriganum Lag.	PUL
Lamiaceae	Teucrium	Teucrium polium	Teucrium polium L.	PUL
Lamiaceae	Thymbra	Thymbra capitata	Thymbra capitata (L.) Cav.	PUL
Lamiaceae	Thymbra	Thymbra spicata	Thymbra spicata L.	PUL
Lamiaceae	Thymus	Thymus longicaulis	Thymus longicaulis C.Presl	PUL
Lamiaceae	Ziziphora	Ziziphora hispanica	Ziziphora hispanica L.	PUL
Lamiaceae	Ziziphora	Ziziphora tenuior	Ziziphora tenuior L.	PUL
Meliaceae	Melia	Melia azedarach	Melia azedarach L.	PUL
Plagiochilaceae	Plagiochila	Plagiochila rutilans	Plagiochila rutilans Lindenb., 1840	PUL
Polygalaceae	Polygala	Polygala senega	Polygala senega L.	PUL
Rutaceae	Agathosma	Agathosma betulina	Agathosma betulina (P.J.Bergius) Pillans	PUL
Solanaceae	Capsicum	Capsicum annuum	Capsicum annuum L.	PUL
Solanaceae	Capsicum	Capsicum frutescens	Capsicum frutescens L.	PUL
Solanaceae	Solanum	Solanum tuberosum	Solanum tuberosum L.	PUL
Anacardiaceae	Pistacia	Pistacia vera	Pistacia vera L.	PIP
Apiaceae	Angelica	Angelica archangelica	Angelica archangelica L.	PIP
Apiaceae	Apium	Apium graveolens	Apium graveolens L.	PIP
Apiaceae	Diplolophium	Diplolophium africanum	Diplolophium africanum Turcz.	PIP
Apiaceae	Cuminum	Cuminum cyminum	Cuminum cyminum L.	PIP
Araceae	Homalomena	Homalomena occulta	Homalomena occulta (Lour.) Schott	PIP
Asteraceae	Achillea	Achillea ageratum	Achillea ageratum L.	PIP
Asteraceae	Achillea	Achillea biebersteinii	Achillea arabica Kotschy	PIP
Asteraceae	Achillea	Achillea grandifolia	Achillea grandifolia Friv.	PIP
Asteraceae	Artemisia	Artemisia deserti	Artemisia deserti Krasch.	PIP
Asteraceae	Artemisia	Artemisia iwayomogi	Artemisia gmelinii var. gmelinii	PIP
Asteraceae	Artemisia	Artemisia gmelinii	Artemisia gmelinii Weber ex Stechm.	PIP
Asteraceae	Artemisia	Artemisia herba-alba	Artemisia herba-alba Asso	PIP
Asteraceae	Artemisia	Artemisia judaica	Artemisia judaica L.	PIP
Asteraceae	Artemisia	Artemisia koidzumii	Artemisia koidzumii Nakai	PIP
Asteraceae	Artemisia	Artemisia salsoloides	Artemisia salsoloides Willd.	PIP
Asteraceae	Artemisia	Artemisia sericea	Artemisia sericea Weber ex Stechm.	PIP
Asteraceae	Bellis	Bellis perennis	Bellis perennis L.	PIP
Asteraceae	Chrysactinia	Chrysactinia mexicana	Chrysactinia mexicana A.Gray	PIP
Asteraceae	Pectis	Pectis elongata	Pectis elongata Kunth	PIP
Asteraceae	Rhanterium	Rhanterium epapposum	Rhanterium epapposum Oliv.	PIP
Asteraceae	Tagetes	Tagetes minuta	Tagetes minuta L.	PIP
Asteraceae	Tanacetum	Tanacetum vulgare	Tanacetum vulgare L.	PIP
Basellaceae	Basella	Basella alba	Basella alba L.	PIP
Cupressaceae	Juniperus	Juniperus excelsa	Juniperus excelsa M.Bieb.	PIP
Cupressaceae	Juniperus	Juniperus monticola	Juniperus monticola Martínez	PIP
Cupressaceae	Thuja	Thuja standishii	Thuja standishii (Gordon) Carrière	PIP
Fabaceae	Tamarindus	Tamarindus indica	Tamarindus indica L.	PIP
Gentianaceae	Swertia	Swertia japonica	Swertia japonica (Schult.) Makino	PIP
Geraniaceae	Pelargonium	Pelargonium tomentosum	Pelargonium tomentosum Jacq.	PIP
Lamiaceae	Agastache	Agastache formosanum	Agastache rugosa (Fisch. & C.A.Mey.) Kuntze	PIP
Lamiaceae	Betonica	Betonica macrantha	Betonica macrantha K.Koch	PIP
Lamiaceae	Clinopodium	Micromeria thymifolia	Clinopodium album (Waldst. & Kit.) Bräuchler & Govaerts	PIP
Lamiaceae	Clinopodium	Clinopodium brownei	Clinopodium brownei (Sw.) Kuntze	PIP
Lamiaceae	Clinopodium	Clinopodium carolinianum	Clinopodium carolinianum Mill.	PIP
Lamiaceae	Clinopodium	Clinopodium congestum	Clinopodium congestum (Boiss. & Hausskn.) Kuntze	PIP
Lamiaceae	Clinopodium	Micromeria congesta	Clinopodium congestum (Boiss. & Hausskn.) Kuntze	PIP
Lamiaceae	Clinopodium	Micromeria dalmatica	Clinopodium dalmaticum (Benth.)	PIP
Lamiaceae	Clinopodium	Clinopodium gilliesii	Clinopodium gilliesii (Benth.) Kuntze	PIP
Lamiaceae	Clinopodium	Satureja parvifolia	Clinopodium gilliesii (Benth.) Kuntze	PIP
Lamiaceae	Clinopodium	Clinopodium grandiflorum	Clinopodium grandiflorum (L.) Kuntze	PIP
Lamiaceae	Clinopodium	Calamintha nepeta	Clinopodium nepeta (L.) Kuntze	PIP
Lamiaceae	Clinopodium	Clinopodium odorum	Clinopodium odorum (Griseb.) Harley	PIP
Lamiaceae	Clinopodium	Satureja odora	Clinopodium odorum (Griseb.) Harley	PIP
Lamiaceae	Clinopodium	Clinopodium serpyllifolium	Clinopodium serpyllifolium (M.Bieb.) Kuntze	PIP
Lamiaceae	Clinopodium	Micromeria fruticosa	Clinopodium serpyllifolium subsp. fruticosum (L.) Bräuchler	PIP
Lamiaceae	Clinopodium	Acinos suaveolens	Clinopodium suaveolens (Sm.) Kuntze	PIP
Lamiaceae	Clinopodium	Clinopodium suaveolens	Clinopodium suaveolens (Sm.) Kuntze	PIP
Lamiaceae	Coleus	Coleus barbatus	Coleus barbatus (Andrews) Benth. ex G.Don	PIP
Lamiaceae	Hyptis	Hyptis emoryi	Condea emoryi (Torr.) Harley & J.F.B.Pastore	PIP
Lamiaceae	Cyclotrichium	Cyclotrichium niveum	Cyclotrichium niveum (Boiss.) Manden. & Scheng	PIP
Lamiaceae	Hedeoma	Hedeoma mandoniana	Hedeoma mandoniana Wedd.	PIP
Lamiaceae	Hedeoma	Hedeoma pulegioides	Hedeoma pulegioides (L.) Pers.	PIP
Lamiaceae	Lepechinia	Lepechinia calycina	Lepechinia calycina (Benth.) Epling	PIP
Lamiaceae	Mentha	Mentha piperita	Mentha × piperita L.	PIP
Lamiaceae	Mentha	Mentha rotundifolia	Mentha × rotundifolia (L.) Huds.	PIP
Lamiaceae	Mentha	Mentha verticillata	Mentha × verticillata L.	PIP
Lamiaceae	Mentha	Mentha aquatica	Mentha aquatica L.	PIP
Lamiaceae	Mentha	Mentha arvensis	Mentha arvensis L.	PIP
Lamiaceae	Mentha	Mentha arvensis var. piperascens	Mentha canadensis L.	PIP
Lamiaceae	Mentha	Mentha longifolia	Mentha longifolia (L.) L.	PIP
Lamiaceae	Mentha	Mentha pulegium	Mentha pulegium L.	PIP
Lamiaceae	Mentha	Mentha spicata	Mentha spicata L.	PIP
Lamiaceae	Mentha	Mentha suaveolens	Mentha suaveolens Ehrh.	PIP
Lamiaceae	Micromeria	Micromeria biflora	Micromeria biflora (Buch.-Ham. ex D.Don)	PIP
Lamiaceae	Micromeria	Micromeria croatica	Micromeria croatica (Pers.) Schott	PIP
Lamiaceae	Micromeria	Satureja douglasii	Micromeria douglasii Benth.	PIP
Lamiaceae	Micromeria	Micromeria juliana	Micromeria juliana (L.) Benth. ex Rchb.	PIP
Lamiaceae	Micromeria	Micromeria myrtifolia	Micromeria myrtifolia Boiss. & Hohen.	PIP
Lamiaceae	Minthostachys	Minthostachys andina	Minthostachys andina (Britton ex Rusby) Epling	PIP
Lamiaceae	Minthostachys	Minthostachys glabrescens	Minthostachys glabrescens (Benth.) Epling	PIP
Lamiaceae	Minthostachys	Bystropogon mollis	Minthostachys mollis (Benth.) Griseb.	PIP
Lamiaceae	Minthostachys	Minthostachys mollis	Minthostachys mollis (Benth.) Griseb.	PIP
Lamiaceae	Monardella	Monardella hypoleuca	Monardella hypoleuca A.Gray	PIP
Lamiaceae	Nepeta	Nepeta cataria	Nepeta cataria L.	PIP
Lamiaceae	Origanum	Origanum cordifolium	Origanum cordifolium (Montbret & Aucher ex Benth.) Vogel	PIP
Lamiaceae	Perilla	Perilla frutescens	Perilla frutescens (L.) Britton	PIP
Lamiaceae	Pycnanthemum	Pycnanthemum beadlei	Pycnanthemum beadlei (Small) Fernald	PIP
Lamiaceae	Pycnanthemum	Pycnanthemum clinopodioides	Pycnanthemum clinopodioides Torr. & A.Gray	PIP
Lamiaceae	Pycnanthemum	Pycnanthemum floridanum	Pycnanthemum floridanum E.Grant & Epling	PIP
Lamiaceae	Pycnanthemum	Pycnanthemum incanum	Pycnanthemum incanum (L.) Michx.	PIP
Lamiaceae	Pycnanthemum	Pycnanthemum montanum	Pycnanthemum montanum Michx.	PIP
Lamiaceae	Pycnanthemum	Pycnanthemum muticum	Pycnanthemum muticum (Michx.) Pers.	PIP
Lamiaceae	Pycnanthemum	Pycnanthemum torreyi	Pycnanthemum torreyi Benth.	PIP
Lamiaceae	Pycnanthemum	Pycnanthemum virginianum	Pycnanthemum virginianum (L.) T.Durand & B.D.Jacks. ex B.L.Rob. & Fernald	PIP
Lamiaceae	Salvia	Rosmarinus officinalis	Salvia rosmarinus Spenn.	PIP
Lamiaceae	Sideritis	Sideritis lasiantha	Sideritis lasiantha Juss. ex Pers.	PIP
Lamiaceae	Teucrium	Teucrium polium	Teucrium polium L.	PIP
Lamiaceae	Vitex	Vitex agnus-castus	Vitex agnus-castus L.	PIP
Lauraceae	Cinnamomum	Cinnamomum camphora	Cinnamomum camphora (L.) J.Presl	PIP
Lauraceae	Cinnamomum	Cinnamomum verum	Cinnamomum verum J.Presl	PIP
Myrtaceae	Actinodium	Actinodium cunninghamii	Actinodium cunninghamii S.Schauer ex Lindl.	PIP
Myrtaceae	Corymbia	Corymbia citriodora	Corymbia citriodora (Hook.) K.D.Hill & L.A.S.Johnson	PIP
Myrtaceae	Corymbia	Eucalyptus citriodora	Corymbia citriodora (Hook.) K.D.Hill & L.A.S.Johnson	PIP
Myrtaceae	Corymbia	Corymbia maculata	Corymbia maculata (Hook.) K.D.Hill & L.A.S.Johnson	PIP
Myrtaceae	Corymbia	Eucalyptus maculata	Corymbia maculata (Hook.) K.D.Hill & L.A.S.Johnson	PIP
Myrtaceae	Eucalyptus	Eucalyptus oviformis	Eucalyptus × oviformis Maiden & Blakely	PIP
Myrtaceae	Eucalyptus	Eucalyptus albens	Eucalyptus albens Benth.	PIP
Myrtaceae	Eucalyptus	Eucalyptus apodophylla	Eucalyptus apodophylla Blakely & Jacobs	PIP
Myrtaceae	Eucalyptus	Eucalyptus approximans	Eucalyptus approximans Maiden	PIP
Myrtaceae	Eucalyptus	Eucalyptus astringens	Eucalyptus astringens (Maiden)	PIP
Myrtaceae	Eucalyptus	Eucalyptus behriana	Eucalyptus behriana F.Muell.	PIP
Myrtaceae	Eucalyptus	Eucalyptus blakelyi	Eucalyptus blakelyi Maiden	PIP
Myrtaceae	Eucalyptus	Eucalyptus bosistoana	Eucalyptus bosistoana F.Muell.	PIP
Myrtaceae	Eucalyptus	Eucalyptus botryoides	Eucalyptus botryoides Sm.	PIP
Myrtaceae	Eucalyptus	Eucalyptus brassiana	Eucalyptus brassiana S.T.Blake	PIP
Myrtaceae	Eucalyptus	Eucalyptus burgessiana	Eucalyptus burgessiana L.A.S.Johnson & Blaxell	PIP
Myrtaceae	Eucalyptus	Eucalyptus camaldulensis	Eucalyptus camaldulensis Dehnh.	PIP
Myrtaceae	Eucalyptus	Eucalyptus cladocalyx	Eucalyptus cladocalyx F.Muell.	PIP
Myrtaceae	Eucalyptus	Eucalyptus cunninghamii	Eucalyptus cunninghamii Sweet	PIP
Myrtaceae	Eucalyptus	Eucalyptus cuprea	Eucalyptus cuprea Brooker & Hopper	PIP
Myrtaceae	Eucalyptus	Eucalyptus dealbata	Eucalyptus dealbata A.Cunn. ex S.Schauer	PIP
Myrtaceae	Eucalyptus	Eucalyptus delegatensis	Eucalyptus delegatensis R.T.Baker	PIP
Myrtaceae	Eucalyptus	Eucalyptus dendromorpha	Eucalyptus dendromorpha (Blakely) L.A.S.Johnson & Blaxell	PIP
Myrtaceae	Eucalyptus	Eucalyptus diversicolor	Eucalyptus diversicolor F.Muell.	PIP
Myrtaceae	Eucalyptus	Eucalyptus dives	Eucalyptus dives S.Schauer	PIP
Myrtaceae	Eucalyptus	Eucalyptus fasciculosa	Eucalyptus fasciculosa F.Muell.	PIP
Myrtaceae	Eucalyptus	Eucalyptus fraxinoides	Eucalyptus fraxinoides H.Deane & Maiden	PIP
Myrtaceae	Eucalyptus	Eucalyptus globulus	Eucalyptus globulus Labill.	PIP
Myrtaceae	Eucalyptus	Eucalyptus maideni	Eucalyptus globulus subsp. maidenii (F.Muell.) J.B.Kirkp.	PIP
Myrtaceae	Eucalyptus	Eucalyptus intertexta	Eucalyptus intertexta R.T.Baker	PIP
Myrtaceae	Eucalyptus	Eucalyptus lansdowneana	Eucalyptus lansdowneana F.Muell. & J.E.Br.	PIP
Myrtaceae	Eucalyptus	Eucalyptus leucoxylon	Eucalyptus leucoxylon F.Muell.	PIP
Myrtaceae	Eucalyptus	Eucalyptus melanophloia	Eucalyptus melanophloia F.Muell.	PIP
Myrtaceae	Eucalyptus	Eucalyptus melliodora	Eucalyptus melliodora A.Cunn. ex S.Schauer	PIP
Myrtaceae	Eucalyptus	Eucalyptus mitchelliana	Eucalyptus mitchelliana Cambage	PIP
Myrtaceae	Eucalyptus	Eucalyptus moluccana	Eucalyptus moluccana Roxb.	PIP
Myrtaceae	Eucalyptus	Eucalyptus occidentalis	Eucalyptus occidentalis Endl.	PIP
Myrtaceae	Eucalyptus	Eucalyptus ochrophloia	Eucalyptus ochrophloia F.Muell.	PIP
Myrtaceae	Eucalyptus	Eucalyptus odorata	Eucalyptus odorata Behr	PIP
Myrtaceae	Eucalyptus	Eucalyptus paliformis	Eucalyptus paliformis L.A.S.Johnson & Blaxell	PIP
Myrtaceae	Eucalyptus	Eucalyptus desquamata	Eucalyptus percostata Brooker & P.J.Lang	PIP
Myrtaceae	Eucalyptus	Eucalyptus polyanthemos	Eucalyptus polyanthemos S.Schauer	PIP
Myrtaceae	Eucalyptus	Eucalyptus populnea	Eucalyptus populnea F.Muell.	PIP
Myrtaceae	Eucalyptus	Eucalyptus porosa	Eucalyptus porosa F.Muell. ex Miq.	PIP
Myrtaceae	Eucalyptus	Eucalyptus saligna	Eucalyptus saligna Sm.	PIP
Myrtaceae	Eucalyptus	Eucalyptus siderophloia	Eucalyptus siderophloia Benth.	PIP
Myrtaceae	Eucalyptus	Eucalyptus sparsa	Eucalyptus sparsa Boomsma	PIP
Myrtaceae	Eucalyptus	Eucalyptus stenostoma	Eucalyptus stenostoma L.A.S.Johnson & Blaxell	PIP
Myrtaceae	Eucalyptus	Eucalyptus triflora	Eucalyptus triflora (Maiden) Blakely	PIP
Myrtaceae	Eucalyptus	Eucalyptus viridis	Eucalyptus viridis R.T.Baker	PIP
Myrtaceae	Melaleuca	Melaleuca alternifolia	Melaleuca alternifolia (Maiden & Betche) Cheel	PIP
Pinaceae	Larix	Larix laricina	Larix laricina (Du Roi) K.Koch	PIP
Pinaceae	Larix	Larix lyallii	Larix lyallii Parl.	PIP
Pinaceae	Larix	Larix occidentalis	Larix occidentalis Nutt.	PIP
Piperaceae	Piper	Piper aduncum	Piper aduncum L.	PIP
Piperaceae	Piper	Piper ossanum	Piper aduncum var. aduncum	PIP
Piperaceae	Piper	Piper guineense	Piper guineense Schumach. & Thonn.	PIP
Piperaceae	Piper	Piper nigrum	Piper nigrum L.	PIP
Pittosporaceae	Pittosporum	Pittosporum balfourii	Pittosporum balfourii Cufod.	PIP
Poaceae	Cymbopogon	Cymbopogon citratus	Cymbopogon citratus (DC.) Stapf	PIP
Poaceae	Cymbopogon	Cymbopogon khasianus	Cymbopogon khasianus (Hack.) Stapf ex Bor	PIP
Poaceae	Cymbopogon	Cymbopogon martinii	Cymbopogon martini (Roxb.)	PIP
Polygalaceae	Polygala	Polygala senega	Polygala senega L.	PIP
Rutaceae	Aegle	Aegle marmelos	Aegle marmelos (L.) Corrêa	PIP
Rutaceae	Agathosma	Agathosma betulina	Agathosma betulina (P.J.Bergius) Pillans	PIP
Rutaceae	Citrus	Citrus aurantiifolia	Citrus × aurantiifolia (Christm.) Swingle	PIP
Rutaceae	Citrus	Citrus aurantium	Citrus × aurantium L.	PIP
Rutaceae	Citrus	Citrus medica	Citrus medica L.	PIP
Rutaceae	Zanthoxylum	Zanthoxylum bungeanum	Zanthoxylum bungeanum Maxim.	PIP
Rutaceae	Zanthoxylum	Zanthoxylum schinifolium	Zanthoxylum schinifolium Siebold & Zucc.	PIP
Schisandraceae	Illicium	Illicium difengpi	Illicium difengpi B.N.Chang	PIP
Solanaceae	Solanum	Solanum habrochaites	Solanum habrochaites S.Knapp & D.M.Spooner	PIP
Verbenaceae	Lippia	Lippia rehmannii	Lippia rehmannii H.Pearson	PIP
Zingiberaceae	Zingiber	Zingiber mioga	Zingiber mioga (Thunb.) Roscoe	PIP
Asteraceae	Rhanterium	Rhanterium epapposum	Rhanterium epapposum Oliv.	NMTL
Brassicaceae	Brassica	Brassica oleracea var. capitata l.	Brassica oleracea L.	NMTL
Lamiaceae	Clinopodium	Clinopodium album	Clinopodium album (Waldst. & Kit.) Bräuchler & Govaerts	NMTL
Lamiaceae	Clinopodium	Micromeria thymifolia	Clinopodium album (Waldst. & Kit.) Bräuchler & Govaerts	NMTL
Lamiaceae	Clinopodium	Clinopodium brownei	Clinopodium brownei (Sw.) Kuntze	NMTL
Lamiaceae	Clinopodium	Satureja glabella	Clinopodium glabellum (Michx.)	NMTL
Lamiaceae	Clinopodium	Calamintha nepeta	Clinopodium nepeta (L.) Kuntze	NMTL
Lamiaceae	Clinopodium	Clinopodium serpyllifolium	Clinopodium serpyllifolium (M.Bieb.) Kuntze	NMTL
Lamiaceae	Clinopodium	Micromeria fruticosa	Clinopodium serpyllifolium subsp. fruticosum (L.) Bräuchler	NMTL
Lamiaceae	Mentha	Mentha piperita	Mentha × piperita L.	NMTL
Lamiaceae	Mentha	Mentha verticillata	Mentha × verticillata L.	NMTL
Lamiaceae	Mentha	Mentha aquatica	Mentha aquatica L.	NMTL
Lamiaceae	Mentha	Mentha arvensis var. piperascens	Mentha canadensis L.	NMTL
Lamiaceae	Mentha	Mentha canadensis	Mentha canadensis L.	NMTL
Lamiaceae	Mentha	Mentha pulegium	Mentha pulegium L.	NMTL
Lamiaceae	Mentha	Mentha spicata	Mentha spicata L.	NMTL
Lamiaceae	Minthostachys	Minthostachys glabrescens	Minthostachys glabrescens (Benth.) Epling	NMTL
Lamiaceae	Minthostachys	Minthostachys mollis	Minthostachys mollis (Benth.) Griseb.	NMTL
Lamiaceae	Pycnanthemum	Pycnanthemum floridanum	Pycnanthemum floridanum E.Grant & Epling	NMTL
Lamiaceae	Pycnanthemum	Pycnanthemum incanum	Pycnanthemum incanum (L.) Michx.	NMTL
Lamiaceae	Pycnanthemum	Pycnanthemum montanum	Pycnanthemum montanum Michx.	NMTL
Lamiaceae	Pycnanthemum	Pycnanthemum muticum	Pycnanthemum muticum (Michx.) Pers.	NMTL
Lamiaceae	Pycnanthemum	Pycnanthemum setosum	Pycnanthemum setosum Nutt.	NMTL
Lamiaceae	Pycnanthemum	Pycnanthemum pilosum	Pycnanthemum verticillatum var. pilosum	NMTL
Lamiaceae	Pycnanthemum	Pycnanthemum virginianum	Pycnanthemum virginianum (L.) T.Durand & B.D.Jacks. ex B.L.Rob. & Fernald	NMTL
Rutaceae	Agathosma	Agathosma betulina	Agathosma betulina (P.J.Bergius) Pillans	NMTL
Geraniaceae	Pelargonium	Pelargonium graveolens	Pelargonium graveolens L'Hér.	NEOISOMTL
Lamiaceae	Betonica	Betonica macrantha	Betonica macrantha K.Koch	NEOISOMTL
Lamiaceae	Clinopodium	Clinopodium carolinianum	Clinopodium carolinianum Mill.	NEOISOMTL
Lamiaceae	Clinopodium	Satureja glabella	Clinopodium glabellum (Michx.)	NEOISOMTL
Lamiaceae	Clinopodium	Clinopodium grandiflorum	Clinopodium grandiflorum (L.) Kuntze	NEOISOMTL
Lamiaceae	Clinopodium	Satureja grandiflora	Clinopodium grandiflorum (L.) Kuntze	NEOISOMTL
Lamiaceae	Mentha	Mentha piperita	Mentha × piperita L.	NEOISOMTL
Lamiaceae	Mentha	Mentha arvensis var. piperascens	Mentha canadensis L.	NEOISOMTL
Lamiaceae	Mentha	Mentha longifolia	Mentha longifolia (L.) L.	NEOISOMTL
Lamiaceae	Mentha	Mentha pulegium	Mentha pulegium L.	NEOISOMTL
Lamiaceae	Mentha	Mentha spicata	Mentha spicata L.	NEOISOMTL
Lamiaceae	Minthostachys	Minthostachys mollis	Minthostachys mollis (Benth.) Griseb.	NEOISOMTL
Lamiaceae	Pycnanthemum	Pycnanthemum muticum	Pycnanthemum muticum (Michx.) Pers.	NEOISOMTL
Rutaceae	Agathosma	Agathosma betulina	Agathosma betulina (P.J.Bergius) Pillans	NEOISOMTL
Acoraceae	Acorus	Acorus calamus	Acorus calamus L.	MTN
Anacardiaceae	Pistacia	Pistacia vera	Pistacia vera L.	MTN
Annonaceae	Xylopia	Xylopia aromatica	Xylopia aromatica (Lam.) Mart.	MTN
Apiaceae	Apium	Apium graveolens	Apium graveolens L.	MTN
Asteraceae	Achillea	Achillea abrotanoides	Achillea abrotanoides (Vis.) Vis.	MTN
Asteraceae	Artemisia	Artemisia dracunculus	Artemisia dracunculus L.	MTN
Asteraceae	Inula	Inula helenium	Inula helenium L.	MTN
Asteraceae	Rhanterium	Rhanterium epapposum	Rhanterium epapposum Oliv.	MTN
Chloranthaceae	Hedyosmum	Hedyosmum mexicanum	Hedyosmum mexicanum C.Cordem.	MTN
Combretaceae	Terminalia	Terminalia bentzoe	Terminalia bentzoe (L.) L.f.	MTN
Crassulaceae	Rhodiola	Rhodiola rosea	Rhodiola rosea L.	MTN
Cupressaceae	Cryptomeria	Cryptomeria japonica	Cryptomeria japonica (Thunb. ex L.f.) D.Don	MTN
Fabaceae	Senna	Senna alexandrina	Senna alexandrina Mill.	MTN
Gentianaceae	Swertia	Swertia japonica	Swertia japonica (Schult.) Makino	MTN
Geraniaceae	Pelargonium	Pelargonium roseum	Pelargonium × hybridum (L.) L'Hér.	MTN
Geraniaceae	Pelargonium	Pelargonium citrosum	Pelargonium cucullatum subsp. cucullatum	MTN
Geraniaceae	Pelargonium	Pelargonium graveolens	Pelargonium graveolens L'Hér.	MTN
Geraniaceae	Pelargonium	Pelargonium quercifolium	Pelargonium quercifolium (L.f.)	MTN
Geraniaceae	Pelargonium	Pelargonium tomentosum	Pelargonium tomentosum Jacq.	MTN
Lamiaceae	Agastache	Agastache foeniculum	Agastache foeniculum (Pursh)	MTN
Lamiaceae	Agastache	Agastache pallidiflora	Agastache pallidiflora (A.Heller) Rydb.	MTN
Lamiaceae	Agastache	Agastache urticifolia	Agastache urticifolia (Benth.) Kuntze	MTN
Lamiaceae	Betonica	Betonica macrantha	Betonica macrantha K.Koch	MTN
Lamiaceae	Clinopodium	Micromeria thymifolia	Clinopodium album (Waldst. & Kit.) Bräuchler & Govaerts	MTN
Lamiaceae	Clinopodium	Clinopodium arkansanum	Clinopodium arkansanum (Nutt.) House	MTN
Lamiaceae	Clinopodium	Clinopodium glabrum	Clinopodium arkansanum (Nutt.) House	MTN
Lamiaceae	Clinopodium	Calamintha incana	Clinopodium brevifolium (Wahlenb.) Bräuchler & Hjertson	MTN
Lamiaceae	Clinopodium	Clinopodium brownei	Clinopodium brownei (Sw.) Kuntze	MTN
Lamiaceae	Clinopodium	Clinopodium carolinianum	Clinopodium carolinianum Mill.	MTN
Lamiaceae	Clinopodium	Clinopodium congestum	Clinopodium congestum (Boiss. & Hausskn.) Kuntze	MTN
Lamiaceae	Clinopodium	Micromeria congesta	Clinopodium congestum (Boiss. & Hausskn.) Kuntze	MTN
Lamiaceae	Clinopodium	Clinopodium gilliesii	Clinopodium gilliesii (Benth.) Kuntze	MTN
Lamiaceae	Clinopodium	Satureja parvifolia	Clinopodium gilliesii (Benth.) Kuntze	MTN
Lamiaceae	Clinopodium	Satureja glabella	Clinopodium glabellum (Michx.)	MTN
Lamiaceae	Clinopodium	Clinopodium grandiflorum	Clinopodium grandiflorum (L.) Kuntze	MTN
Lamiaceae	Clinopodium	Satureja grandiflora	Clinopodium grandiflorum (L.) Kuntze	MTN
Lamiaceae	Clinopodium	Clinopodium menthifolium	Clinopodium menthifolium (Host) Merino	MTN
Lamiaceae	Clinopodium	Calamintha nepeta	Clinopodium nepeta (L.) Kuntze	MTN
Lamiaceae	Clinopodium	Clinopodium nepeta	Clinopodium nepeta (L.) Kuntze	MTN
Lamiaceae	Clinopodium	Clinopodium pamphylicum	Clinopodium pamphylicum (Boiss. & Heldr.) Govaerts	MTN
Lamiaceae	Clinopodium	Clinopodium serpyllifolium	Clinopodium serpyllifolium (M.Bieb.) Kuntze	MTN
Lamiaceae	Clinopodium	Micromeria fruticosa	Clinopodium serpyllifolium subsp. fruticosum (L.) Bräuchler	MTN
Lamiaceae	Clinopodium	Acinos suaveolens	Clinopodium suaveolens (Sm.) Kuntze	MTN
Lamiaceae	Clinopodium	Clinopodium suaveolens	Clinopodium suaveolens (Sm.) Kuntze	MTN
Lamiaceae	Cyclotrichium	Cyclotrichium niveum	Cyclotrichium niveum (Boiss.) Manden. & Scheng.	MTN
Lamiaceae	Dracocephalum	Dracocephalum thymiflora	Dracocephalum thymiflorum L.	MTN
Lamiaceae	Dracocephalum	Moldavica thymiflora	Dracocephalum thymiflorum L.	MTN
Lamiaceae	Hedeoma	Hedeoma drummondii	Hedeoma drummondii Benth.	MTN
Lamiaceae	Hedeoma	Hedeoma mandoniana	Hedeoma mandoniana Wedd.	MTN
Lamiaceae	Hedeoma	Hedeoma multiflora	Hedeoma multiflora Benth.	MTN
Lamiaceae	Hedeoma	Hedeoma pulegioides	Hedeoma pulegioides (L.) Pers.	MTN
Lamiaceae	Hesperozygis	Hesperozygis rhododon	Hesperozygis rhododon Epling	MTN
Lamiaceae	Hesperozygis	Hesperozygis ringens	Hesperozygis ringens (Benth.) Epling	MTN
Lamiaceae	Hyssopus	Hyssopus seravschanicus	Hyssopus seravschanicus (Dubj.) Pazij	MTN
Lamiaceae	Lavandula	Lavandula stoechas	Lavandula stoechas L.	MTN
Lamiaceae	Lepechinia	Lepechinia calycina	Lepechinia calycina (Benth.) Epling	MTN
Lamiaceae	Lepechinia	Lepechinia chamaedryoides	Lepechinia chilensis (Molina) R.Morales	MTN
Lamiaceae	Mentha	Mentha piperita	Mentha × piperita L.	MTN
Lamiaceae	Mentha	Mentha x piperita	Mentha × piperita L.	MTN
Lamiaceae	Mentha	Mentha rotundifolia	Mentha × rotundifolia (L.) Huds.	MTN
Lamiaceae	Mentha	Mentha x rotundifolia	Mentha × rotundifolia (L.) Huds.	MTN
Lamiaceae	Mentha	Mentha verticillata	Mentha × verticillata L.	MTN
Lamiaceae	Mentha	Mentha aquatica	Mentha aquatica L.	MTN
Lamiaceae	Mentha	Mentha arvensis	Mentha arvensis L.	MTN
Lamiaceae	Mentha	Mentha arvensis var. piperascens	Mentha canadensis L.	MTN
Lamiaceae	Mentha	Mentha canadensis	Mentha canadensis L.	MTN
Lamiaceae	Mentha	Mentha grandiflora	Mentha grandiflora Benth.	MTN
Lamiaceae	Mentha	Mentha longifolia	Mentha longifolia (L.) L.	MTN
Lamiaceae	Mentha	Mentha pulegium	Mentha pulegium L.	MTN
Lamiaceae	Mentha	Mentha spicata	Mentha spicata L.	MTN
Lamiaceae	Mentha	Mentha suaveolens	Mentha suaveolens Ehrh.	MTN
Lamiaceae	Micromeria	Micromeria croatica	Micromeria croatica (Pers.) Schott	MTN
Lamiaceae	Micromeria	Clinopodium douglasii	Micromeria douglasii Benth.	MTN
Lamiaceae	Micromeria	Satureja douglasii	Micromeria douglasii Benth.	MTN
Lamiaceae	Micromeria	Micromeria juliana	Micromeria juliana (L.) Benth. ex Rchb.	MTN
Lamiaceae	Micromeria	Micromeria myrtifolia	Micromeria myrtifolia Boiss. & Hohen.	MTN
Lamiaceae	Minthostachys	Minthostachys andina	Minthostachys andina (Britton ex Rusby) Epling	MTN
Lamiaceae	Minthostachys	Minthostachys glabrescens	Minthostachys glabrescens (Benth.) Epling	MTN
Lamiaceae	Minthostachys	Bystropogon mollis	Minthostachys mollis (Benth.) Griseb.	MTN
Lamiaceae	Minthostachys	Minthostachys mollis	Minthostachys mollis (Benth.) Griseb.	MTN
Lamiaceae	Minthostachys	Minthostachys verticillata	Minthostachys verticillata (Griseb.) Epling	MTN
Lamiaceae	Nepeta	Schizonepeta tenuifolia	Nepeta multifida L.	MTN
Lamiaceae	Ocimum	Ocimum basilicum	Ocimum basilicum L.	MTN
Lamiaceae	Platostoma	Platostoma africanum	Platostoma africanum P.Beauv.	MTN
Lamiaceae	Poliomintha	Poliomintha incana	Poliomintha incana (Torr.) A.Gray	MTN
Lamiaceae	Pycnanthemum	Pycnanthemum albescens	Pycnanthemum albescens Torr. & A.Gray	MTN
Lamiaceae	Pycnanthemum	Pycnanthemum beadlei	Pycnanthemum beadlei (Small) Fernald	MTN
Lamiaceae	Pycnanthemum	Pycnanthemum californicum	Pycnanthemum californicum Torr. ex Durand	MTN
Lamiaceae	Pycnanthemum	Pycnanthemum clinopodioides	Pycnanthemum clinopodioides Torr. & A.Gray	MTN
Lamiaceae	Pycnanthemum	Pycnanthemum floridanum	Pycnanthemum floridanum E.Grant & Epling	MTN
Lamiaceae	Pycnanthemum	Pycnanthemum incanum	Pycnanthemum incanum (L.) Michx.	MTN
Lamiaceae	Pycnanthemum	Pycnanthemum montanum	Pycnanthemum montanum Michx.	MTN
Lamiaceae	Pycnanthemum	Pycnanthemum muticum	Pycnanthemum muticum (Michx.) Pers.	MTN
Lamiaceae	Pycnanthemum	Pycnanthemum pycnanthemoides	Pycnanthemum pycnanthemoides (Leavenw.) Fernald	MTN
Lamiaceae	Pycnanthemum	Pycnanthemum setosum	Pycnanthemum setosum Nutt.	MTN
Lamiaceae	Pycnanthemum	Pycnanthemum tenuifolium	Pycnanthemum tenuifolium Schrad.	MTN
Lamiaceae	Pycnanthemum	Pycnanthemum torreyi	Pycnanthemum torreyi Benth.	MTN
Lamiaceae	Pycnanthemum	Pycnanthemum verticillatum	Pycnanthemum verticillatum (Michx.) Pers.	MTN
Lamiaceae	Pycnanthemum	Pycnanthemum pilosum	Pycnanthemum verticillatum var. pilosum	MTN
Lamiaceae	Pycnanthemum	Pycnanthemum virginianum	Pycnanthemum virginianum (L.) T.Durand & B.D.Jacks. ex B.L.Rob. & Fernald	MTN
Lamiaceae	Scutellaria	Scutellaria galericulata	Scutellaria galericulata L.	MTN
Lamiaceae	Thymus	Thymus longicaulis	Thymus longicaulis C.Presl	MTN
Lamiaceae	Thymus	Thymus vulgaris	Thymus vulgaris L.	MTN
Plagiochilaceae	Plagiochila	Plagiochila rutilans	Plagiochila rutilans Lindenb., 1840	MTN
Poaceae	Cymbopogon	Cymbopogon citratus	Cymbopogon citratus (DC.) Stapf	MTN
Poaceae	Elymus	Elytrigia repens	Elymus repens (L.) Gould	MTN
Polygalaceae	Polygala	Polygala senega	Polygala senega L.	MTN
Rutaceae	Agathosma	Agathosma betulina	Agathosma betulina (P.J.Bergius) Pillans	MTN
Zingiberaceae	Elatteria	Elettaria cardamomum	Elettaria cardamomum (L.) Maton	MTN
Acoraceae	Acorus	Acorus calamus	Acorus calamus L.	MTL
Apiaceae	Levisticum	Levisticum officinale	Levisticum officinale W.D.J.Koch	MTL
Arecaceae	Cocos	Cocos nucifera	Cocos nucifera L.	MTL
Asteraceae	Achillea	Achillea cuneatiloba	Achillea cuneatiloba Boiss. & Buhse	MTL
Asteraceae	Achillea	Achillea millefolium	Achillea millefolium L.	MTL
Asteraceae	Artemisia	Artemisia annua	Artemisia annua L.	MTL
Asteraceae	Artemisia	Artemisia argyi	Artemisia argyi H.Lév. & Vaniot	MTL
Asteraceae	Artemisia	Artemisia dracunculus	Artemisia dracunculus L.	MTL
Asteraceae	Artemisia	Artemisia lagocephala	Artemisia lagocephala (Fisch. ex Besser) DC.	MTL
Asteraceae	Artemisia	Artemisia rubripes	Artemisia rubripes Nakai	MTL
Asteraceae	Helianthus	Helianthus annuus	Helianthus annuus L.	MTL
Asteraceae	Matricaria	Matricaria chamomilla	Matricaria chamomilla L.	MTL
Brassicaceae	Brassica	Brassica oleracea var. capitata l.	Brassica oleracea L.	MTL
Cupressaceae	Juniperus	Juniperus communis	Juniperus communis L.	MTL
Diaporthaceae	Phomopsis	Phomopsis amygdali	Fusicoccum amygdali	MTL
Ericaceae	Rhododendron	Rhododendron dauricum	Rhododendron dauricum L.	MTL
Fabaceae	Ononis	Ononis spinosa	Ononis spinosa L.	MTL
Fabaceae	Senna	Senna alexandrina	Senna alexandrina Mill.	MTL
Geraniaceae	Pelargonium	Pelargonium graveolens	Pelargonium graveolens L'Hér.	MTL
Lamiaceae	Betonica	Betonica macrantha	Betonica macrantha K.Koch	MTL
Lamiaceae	Clinopodium	Micromeria thymifolia	Clinopodium album (Waldst. & Kit.) Bräuchler & Govaerts	MTL
Lamiaceae	Clinopodium	Clinopodium brownei	Clinopodium brownei (Sw.) Kuntze	MTL
Lamiaceae	Clinopodium	Clinopodium carolinianum	Clinopodium carolinianum Mill.	MTL
Lamiaceae	Clinopodium	Clinopodium gilliesii	Clinopodium gilliesii (Benth.) Kuntze	MTL
Lamiaceae	Clinopodium	Satureja parvifolia	Clinopodium gilliesii (Benth.) Kuntze	MTL
Lamiaceae	Clinopodium	Clinopodium grandiflorum	Clinopodium grandiflorum (L.) Kuntze	MTL
Lamiaceae	Clinopodium	Satureja grandiflora	Clinopodium grandiflorum (L.) Kuntze	MTL
Lamiaceae	Clinopodium	Calamintha nepeta	Clinopodium nepeta (L.) Kuntze	MTL
Lamiaceae	Clinopodium	Clinopodium odorum	Clinopodium odorum (Griseb.) Harley	MTL
Lamiaceae	Clinopodium	Satureja odora	Clinopodium odorum (Griseb.) Harley	MTL
Lamiaceae	Clinopodium	Clinopodium pamphylicum	Clinopodium pamphylicum (Boiss. & Heldr.) Govaerts	MTL
Lamiaceae	Clinopodium	Clinopodium serpyllifolium	Clinopodium serpyllifolium (M.Bieb.) Kuntze	MTL
Lamiaceae	Clinopodium	Micromeria fruticosa	Clinopodium serpyllifolium subsp. fruticosum (L.) Bräuchler	MTL
Lamiaceae	Clinopodium	Acinos suaveolens	Clinopodium suaveolens (Sm.) Kuntze	MTL
Lamiaceae	Dittrichia	Dittrichia	Dittrichia viscosa (L.) Greuter	MTL
Lamiaceae	Glechoma	Glechoma hederacea	Glechoma hederacea L.	MTL
Lamiaceae	Hedeoma	Hedeoma drummondii	Hedeoma drummondii Benth.	MTL
Lamiaceae	Hedeoma	Hedeoma pulegioides	Hedeoma pulegioides (L.) Pers.	MTL
Lamiaceae	Lavandula	Lavandula stoechas	Lavandula stoechas L.	MTL
Lamiaceae	Mentha	Mentha piperita	Mentha × piperita L.	MTL
Lamiaceae	Mentha	Mentha x rotundifolia	Mentha × rotundifolia (L.) Huds.	MTL
Lamiaceae	Mentha	Mentha verticillata	Mentha × verticillata L.	MTL
Lamiaceae	Mentha	Mentha aquatica	Mentha aquatica L.	MTL
Lamiaceae	Mentha	Mentha arvensis	Mentha arvensis L.	MTL
Lamiaceae	Mentha	Mentha arvensis var. piperascens	Mentha canadensis L.	MTL
Lamiaceae	Mentha	Mentha canadensis	Mentha canadensis L.	MTL
Lamiaceae	Mentha	Mentha longifolia	Mentha longifolia (L.) L.	MTL
Lamiaceae	Mentha	Mentha pulegium	Mentha pulegium L.	MTL
Lamiaceae	Mentha	Mentha spicata	Mentha spicata L.	MTL
Lamiaceae	Mesosphaerum	Mesosphaerum sidifolium	Mesosphaerum sidifolium (L'Hér.) Harley & J.F.B.Pastore	MTL
Lamiaceae	Mesosphaerum	Hyptis suaveolens	Mesosphaerum suaveolens (L.) Kuntze	MTL
Lamiaceae	Minthostachys	Minthostachys glabrescens	Minthostachys glabrescens (Benth.) Epling	MTL
Lamiaceae	Minthostachys	Minthostachys mollis	Minthostachys mollis (Benth.) Griseb.	MTL
Lamiaceae	Ocimum	Ocimum basilicum	Ocimum basilicum L.	MTL
Lamiaceae	Ocimum	Ocimum gratissimum	Ocimum gratissimum L.	MTL
Lamiaceae	Origanum	Origanum majorana	Origanum majorana L.	MTL
Lamiaceae	Origanum	Origanum vulgare	Origanum vulgare L.	MTL
Lamiaceae	Platostoma	Platostoma africanum	Platostoma africanum P.Beauv.	MTL
Lamiaceae	Pycnanthemum	Pycnanthemum beadlei	Pycnanthemum beadlei (Small) Fernald	MTL
Lamiaceae	Pycnanthemum	Pycnanthemum clinopodioides	Pycnanthemum clinopodioides Torr. & A.Gray	MTL
Lamiaceae	Pycnanthemum	Pycnanthemum incanum	Pycnanthemum incanum (L.) Michx.	MTL
Lamiaceae	Pycnanthemum	Pycnanthemum montanum	Pycnanthemum montanum Michx.	MTL
Lamiaceae	Pycnanthemum	Pycnanthemum muticum	Pycnanthemum muticum (Michx.) Pers.	MTL
Lamiaceae	Pycnanthemum	Pycnanthemum setosum	Pycnanthemum setosum Nutt.	MTL
Lamiaceae	Pycnanthemum	Pycnanthemum tenuifolium	Pycnanthemum tenuifolium Schrad.	MTL
Lamiaceae	Pycnanthemum	Pycnanthemum pilosum	Pycnanthemum verticillatum var. pilosum	MTL
Lamiaceae	Pycnanthemum	Pycnanthemum virginianum	Pycnanthemum virginianum (L.) T.Durand & B.D.Jacks. ex B.L.Rob. & Fernald	MTL
Lamiaceae	Salvia	Salvia officinalis	Salvia officinalis L.	MTL
Lamiaceae	Sideritis	Sideritis scardica	Sideritis scardica Griseb.	MTL
Lamiaceae	Thymus	Thymus carnosus	Thymus carnosus Boiss.	MTL
Lamiaceae	Vitex	Vitex agnus-castus	Vitex agnus-castus L.	MTL
Myrtaceae	Corymbia	Eucalyptus citriodora	Corymbia citriodora (Hook.) K.D.Hill & L.A.S.Johnson	MTL
Myrtaceae	Pimenta	Pimenta dioica	Pimenta dioica (L.) Merr.	MTL
Myrtaceae	Psidium	Psidium guajava	Psidium guajava L.	MTL
Poaceae	Cymbopogon	Cymbopogon citratus	Cymbopogon citratus (DC.) Stapf	MTL
Poaceae	Cymbopogon	Cymbopogon nardus	Cymbopogon nardus (L.) Rendle	MTL
Poaceae	Elymus	Elytrigia repens	Elymus repens (L.) Gould	MTL
Poaceae	Zea	Zea mays	Zea mays L.	MTL
Polygonaceae	Rheum	Rheum palmatum	Rheum palmatum L.	MTL
Rosaceae	Malus	Malus domestica	Malus domestica (Suckow) Borkh.	MTL
Rosaceae	Malus	Malus sylvestris	Malus sylvestris (L.) Mill.	MTL
Rosaceae	Rosa	Rosa centifolia	Rosa × centifolia L.	MTL
Rosaceae	Rosa	Rosa gallica	Rosa gallica L.	MTL
Rutaceae	Agathosma	Agathosma betulina	Agathosma betulina (P.J.Bergius) Pillans	MTL
Rutaceae	Atalantia	Atalantia buxifolia	Atalantia buxifolia (Poir.) Oliv. ex Benth.	MTL
Rutaceae	Zanthoxylum	Zanthoxylum schinifolium	Zanthoxylum schinifolium Siebold & Zucc.	MTL
Sapindaceae	Litchi	Litchi chinensis	Litchi chinensis Sonn.	MTL
Solanaceae	Solanum	Solanum tuberosum	Solanum tuberosum L.	MTL
Theaceae	Camellia	Camellia sinensis	Camellia sinensis (L.) Kuntze	MTL
Viburnaceae	Sambucus	Sambucus nigra	Sambucus nigra L.	MTL
Annonaceae	Xylopia	Xylopia aromatica	Xylopia aromatica (Lam.) Mart.	ISOMTN
Cistaceae	Cistus	Cistus ladaniferus	Cistus ladanifer L.	ISOMTN
Combretaceae	Terminalia	Terminalia bentzoe	Terminalia bentzoe (L.) L.f.	ISOMTN
Crassulaceae	Rhodiola	Rhodiola rosea	Rhodiola rosea L.	ISOMTN
Cupressaceae	Cryptomeria	Cryptomeria japonica	Cryptomeria japonica (Thunb. ex L.f.) D.Don	ISOMTN
Geraniaceae	Pelargonium	Pelargonium roseum	Pelargonium × hybridum (L.) L'Hér.	ISOMTN
Geraniaceae	Pelargonium	Pelargonium citrosum	Pelargonium cucullatum subsp. cucullatum	ISOMTN
Geraniaceae	Pelargonium	Pelargonium graveolens	Pelargonium graveolens L'Hér.	ISOMTN
Geraniaceae	Pelargonium	Pelargonium quercifolium	Pelargonium quercifolium (L.f.)	ISOMTN
Geraniaceae	Pelargonium	Pelargonium tomentosum	Pelargonium tomentosum Jacq.	ISOMTN
Grossulariaceae	Ribes	Ribes nigrum	Ribes nigrum L.	ISOMTN
Lamiaceae	Agastache	Agastache pallidiflora	Agastache pallidiflora (A.Heller) Rydb.	ISOMTN
Lamiaceae	Agastache	Agastache formosana	Agastache rugosa (Fisch. & C.A.Mey.) Kuntze	ISOMTN
Lamiaceae	Agastache	Agastache urticifolia	Agastache urticifolia (Benth.) Kuntze	ISOMTN
Lamiaceae	Betonica	Betonica macrantha	Betonica macrantha K.Koch	ISOMTN
Lamiaceae	Clinopodium	Micromeria thymifolia	Clinopodium album (Waldst. & Kit.) Bräuchler & Govaerts	ISOMTN
Lamiaceae	Clinopodium	Calamintha incana	Clinopodium brevifolium (Wahlenb.) Bräuchler & Hjertson	ISOMTN
Lamiaceae	Clinopodium	Clinopodium brownei	Clinopodium brownei (Sw.) Kuntze	ISOMTN
Lamiaceae	Clinopodium	Clinopodium carolinianum	Clinopodium carolinianum Mill.	ISOMTN
Lamiaceae	Clinopodium	Clinopodium congestum	Clinopodium congestum (Boiss. & Hausskn.) Kuntze	ISOMTN
Lamiaceae	Clinopodium	Micromeria congesta	Clinopodium congestum (Boiss. & Hausskn.) Kuntze	ISOMTN
Lamiaceae	Clinopodium	Micromeria dalmatica	Clinopodium dalmaticum (Benth.)	ISOMTN
Lamiaceae	Clinopodium	Satureja glabella	Clinopodium glabellum (Michx.)	ISOMTN
Lamiaceae	Clinopodium	Clinopodium grandiflorum	Clinopodium grandiflorum (L.) Kuntze	ISOMTN
Lamiaceae	Clinopodium	Satureja grandiflora	Clinopodium grandiflorum (L.) Kuntze	ISOMTN
Lamiaceae	Clinopodium	Clinopodium menthifolium	Clinopodium menthifolium (Host) Merino	ISOMTN
Lamiaceae	Clinopodium	Calamintha nepeta	Clinopodium nepeta (L.) Kuntze	ISOMTN
Lamiaceae	Clinopodium	Clinopodium serpyllifolium	Clinopodium serpyllifolium (M.Bieb.) Kuntze	ISOMTN
Lamiaceae	Clinopodium	Micromeria fruticosa	Clinopodium serpyllifolium subsp. fruticosum (L.) Bräuchler	ISOMTN
Lamiaceae	Clinopodium	Acinos suaveolens	Clinopodium suaveolens (Sm.) Kuntze	ISOMTN
Lamiaceae	Clinopodium	Clinopodium suaveolens	Clinopodium suaveolens (Sm.) Kuntze	ISOMTN
Lamiaceae	Cyclotrichium	Cyclotrichium niveum	Cyclotrichium niveum (Boiss.) Manden. & Scheng.	ISOMTN
Lamiaceae	Dracocephalum	Dracocephalum thymiflora	Dracocephalum thymiflorum L.	ISOMTN
Lamiaceae	Dracocephalum	Moldavica thymiflora	Dracocephalum thymiflorum L.	ISOMTN
Lamiaceae	Glechoma	Glechoma hederacea	Glechoma hederacea L.	ISOMTN
Lamiaceae	Hedeoma	Hedeoma drummondii	Hedeoma drummondii Benth.	ISOMTN
Lamiaceae	Hedeoma	Hedeoma mandoniana	Hedeoma mandoniana Wedd.	ISOMTN
Lamiaceae	Hedeoma	Hedeoma multiflora	Hedeoma multiflora Benth.	ISOMTN
Lamiaceae	Hedeoma	Hedeoma pulegioides	Hedeoma pulegioides (L.) Pers.	ISOMTN
Lamiaceae	Hesperozygis	Hesperozygis rhododon	Hesperozygis rhododon Epling	ISOMTN
Lamiaceae	Lepechinia	Lepechinia calycina	Lepechinia calycina (Benth.) Epling	ISOMTN
Lamiaceae	Lepechinia	Lepechinia chamaedryoides	Lepechinia chilensis (Molina) R.Morales	ISOMTN
Lamiaceae	Mentha	Mentha piperita	Mentha × piperita L.	ISOMTN
Lamiaceae	Mentha	Mentha x piperita	Mentha × piperita L.	ISOMTN
Lamiaceae	Mentha	Mentha verticillata	Mentha × verticillata L.	ISOMTN
Lamiaceae	Mentha	Mentha aquatica	Mentha aquatica L.	ISOMTN
Lamiaceae	Mentha	Mentha arvensis	Mentha arvensis L.	ISOMTN
Lamiaceae	Mentha	Mentha arvensis var. piperascens	Mentha canadensis L.	ISOMTN
Lamiaceae	Mentha	Mentha longifolia	Mentha longifolia (L.) L.	ISOMTN
Lamiaceae	Mentha	Mentha pulegium	Mentha pulegium L.	ISOMTN
Lamiaceae	Mentha	Mentha spicata	Mentha spicata L.	ISOMTN
Lamiaceae	Micromeria	Micromeria croatica	Micromeria croatica (Pers.) Schott	ISOMTN
Lamiaceae	Micromeria	Clinopodium douglasii	Micromeria douglasii Benth.	ISOMTN
Lamiaceae	Micromeria	Satureja douglasii	Micromeria douglasii Benth.	ISOMTN
Lamiaceae	Micromeria	Micromeria juliana	Micromeria juliana (L.) Benth. ex Rchb.	ISOMTN
Lamiaceae	Micromeria	Micromeria myrtifolia	Micromeria myrtifolia Boiss. & Hohen.	ISOMTN
Lamiaceae	Minthostachys	Minthostachys andina	Minthostachys andina (Britton ex Rusby) Epling	ISOMTN
Lamiaceae	Minthostachys	Minthostachys glabrescens	Minthostachys glabrescens (Benth.) Epling	ISOMTN
Lamiaceae	Minthostachys	Bystropogon mollis	Minthostachys mollis (Benth.) Griseb.	ISOMTN
Lamiaceae	Minthostachys	Minthostachys mollis	Minthostachys mollis (Benth.) Griseb.	ISOMTN
Lamiaceae	Monarda	Monarda citriodora	Monarda citriodora Cerv. ex Lag.	ISOMTN
Lamiaceae	Monarda	Monarda didyma	Monarda didyma L.	ISOMTN
Lamiaceae	Monarda	Monarda fistulosa	Monarda fistulosa L.	ISOMTN
Lamiaceae	Monarda	Monarda lindheimeri	Monarda lindheimeri Engelm. & A.Gray	ISOMTN
Lamiaceae	Monarda	Monarda punctata	Monarda punctata L.	ISOMTN
Lamiaceae	Monarda	Monarda russeliana	Monarda russeliana Nutt. ex Sims	ISOMTN
Lamiaceae	Poliomintha	Poliomintha incana	Poliomintha incana (Torr.) A.Gray	ISOMTN
Lamiaceae	Pycnanthemum	Pycnanthemum albescens	Pycnanthemum albescens Torr. & A.Gray	ISOMTN
Lamiaceae	Pycnanthemum	Pycnanthemum beadlei	Pycnanthemum beadlei (Small) Fernald	ISOMTN
Lamiaceae	Pycnanthemum	Pycnanthemum californicum	Pycnanthemum californicum Torr. ex Durand	ISOMTN
Lamiaceae	Pycnanthemum	Pycnanthemum clinopodioides	Pycnanthemum clinopodioides Torr. & A.Gray	ISOMTN
Lamiaceae	Pycnanthemum	Pycnanthemum floridanum	Pycnanthemum floridanum E.Grant & Epling	ISOMTN
Lamiaceae	Pycnanthemum	Pycnanthemum incanum	Pycnanthemum incanum (L.) Michx.	ISOMTN
Lamiaceae	Pycnanthemum	Pycnanthemum montanum	Pycnanthemum montanum Michx.	ISOMTN
Lamiaceae	Pycnanthemum	Pycnanthemum muticum	Pycnanthemum muticum (Michx.) Pers.	ISOMTN
Lamiaceae	Pycnanthemum	Pycnanthemum pycnanthemoides	Pycnanthemum pycnanthemoides (Leavenw.) Fernald	ISOMTN
Lamiaceae	Pycnanthemum	Pycnanthemum setosum	Pycnanthemum setosum Nutt.	ISOMTN
Lamiaceae	Pycnanthemum	Pycnanthemum tenuifolium	Pycnanthemum tenuifolium Schrad.	ISOMTN
Lamiaceae	Pycnanthemum	Pycnanthemum torreyi	Pycnanthemum torreyi Benth.	ISOMTN
Lamiaceae	Pycnanthemum	Pycnanthemum verticillatum	Pycnanthemum verticillatum (Michx.) Pers.	ISOMTN
Lamiaceae	Pycnanthemum	Pycnanthemum pilosum	Pycnanthemum verticillatum var. pilosum	ISOMTN
Lamiaceae	Pycnanthemum	Pycnanthemum virginianum	Pycnanthemum virginianum (L.) T.Durand & B.D.Jacks. ex B.L.Rob. & Fernald	ISOMTN
Lamiaceae	Thymus	Thymus longicaulis	Thymus longicaulis C.Presl	ISOMTN
Plagiochilaceae	Plagiochila	Plagiochila rutilans	Plagiochila rutilans Lindenb., 1840	ISOMTN
Polygalaceae	Polygala	Polygala senega	Polygala senega L.	ISOMTN
Rutaceae	Agathosma	Agathosma betulina	Agathosma betulina (P.J.Bergius) Pillans	ISOMTN
Asteraceae	Helianthus	Helianthus annuus	Helianthus annuus L.	ISOMTL
Brassicaceae	Brassica	Brassica oleracea var. capitata l.	Brassica oleracea L.	ISOMTL
Ephedraceae	Ephedra	Ephedra sinica	Ephedra sinica Stapf	ISOMTL
Lamiaceae	Clinopodium	Satureja glabella	Clinopodium glabellum (Michx.)	ISOMTL
Lamiaceae	Clinopodium	Micromeria fruticosa	Clinopodium serpyllifolium subsp. fruticosum (L.) Bräuchler	ISOMTL
Lamiaceae	Mentha	Mentha x piperita	Mentha × piperita L.	ISOMTL
Lamiaceae	Mentha	Mentha arvensis var. piperascens	Mentha canadensis L.	ISOMTL
Lamiaceae	Mentha	Mentha longifolia	Mentha longifolia (L.) L.	ISOMTL
Lamiaceae	Mentha	Mentha pulegium	Mentha pulegium L.	ISOMTL
Lamiaceae	Mentha	Mentha requienii	Mentha requienii Benth.	ISOMTL
Lamiaceae	Minthostachys	Minthostachys mollis	Minthostachys mollis (Benth.) Griseb.	ISOMTL
Polygonaceae	Rheum	Rheum palmatum	Rheum palmatum L.	ISOMTL
